# Supplementary material
Source: publisher figshare collection journal article supplement (https://future-science-group.figshare.com/ndownloader/files/29016699)
Supplement: Supplementary file 1 [file 29016699]

## Sheet: NOTCH-immune PPI network
Table S3: The list of genes in NOTCH-immune PPI network.
PARTICIPANT_A	PARTICIPANT_B	CELL TYPE
EP300	FKBP4	Central memory CD8 T cell
NCOR2	RARA	Central memory CD8 T cell
NOTCH2	UBA52	Central memory CD8 T cell
NCOR2	NFKBIA	Effector memeory CD8 T cell
EP300	ETS1	Activated CD4 T cell
CREBBP	GLIPR1	Central memory CD4 T cell
EP300	ITGB2	Central memory CD4 T cell
EP300	KLF5	Central memory CD4 T cell
NCOR2	SMAD4	Central memory CD4 T cell
EP300	XRCC6	Central memory CD4 T cell
EP300	EZH2	Effector memeory CD4 T cell
EP300	TAL1	Effector memeory CD4 T cell
EP300	FGF2	T follicular helper cell
EP300	CEBPA	T follicular helper cell
EP300	PRDX1	T follicular helper cell
EP300	CD36	Gamma delta T cell
EP300	LGALS1	Gamma delta T cell
CREBBP	FABP1	Gamma delta T cell
EP300	TBX21	Type 1 T helper cell
EP300	SAV1	Type 1 T helper cell
EP300	SELE	Type 1 T helper cell
EP300	ZEB2	Type 1 T helper cell
EP300	IRF1	Type 1 T helper cell
NCOR2	TNIP2	Type 17 T helper cell
NCOR2	ABCA1	Type 17 T helper cell
EP300	ABCB1	Type 17 T helper cell
EP300	PLA2G4A	Type 2 T helper cell
EP300	GATA3	Type 2 T helper cell
EP300	HELLS	Type 2 T helper cell
EP300	FOXP3	Regulatory T cell
EP300	SPIB	Activated B cell
EP300	TCL1A	Activated B cell
EP300	CYBB	Immature B cell
EP300	NCF1	Immature B cell
NCOR1	MYC	Memory B cell
EP300	RUNX2	Memory B cell
NCOR2	STAT5A	Memory B cell
NCOR2	STAT5B	Memory B cell
CREBBP	DAXX	Natural killer cell
EP300	FN1	Natural killer cell
EP300	GRB2	Natural killer cell
EP300	BCL2	Natural killer cell
CREBBP	CSNK2A2	CD56bright natural killer cell
EP300	GATA2	CD56bright natural killer cell
SPEN	HEY1	CD56bright natural killer cell
EP300	HOXA1	CD56bright natural killer cell
NOTCH2	NOTCH3	CD56dim natural killer cell
EP300	PSMC4	CD56dim natural killer cell
EP300	PTGES2	Myeloid derived suppressor cell
CREBBP	CRTC2	Natural killer T cell
EP300	CSF2	Natural killer T cell
EP300	LAMP2	Natural killer T cell
EP300	FOSL1	Natural killer T cell
EP300	BCL2L1	Activated dendritic cell
NCOR2	NOS2	Activated dendritic cell
SPEN	SRA1	Activated dendritic cell
CREBBP	DDX17	Plasmacytoid dendritic cell
EP300	MAGED1	Plasmacytoid dendritic cell
CREBBP	SERTAD2	Plasmacytoid dendritic cell
EP300	IGF1	Plasmacytoid dendritic cell
EP300	ITGA2B	Plasmacytoid dendritic cell
EP300	GPX1	Plasmacytoid dendritic cell
CREBBP	ACADM	Immature dendritic cell
NOTCH2	RDX	Immature dendritic cell
EP300	FOSB	Eosinophil
CREBBP	DACH1	Eosinophil
EP300	HSPA6	Mast cell
NCOR2	PTGS2	Mast cell
NCOR2	CD3D	Activated CD8 T cell
NCOR2	CD3E	Activated CD8 T cell
NCOR2	CD3G	Activated CD8 T cell
SPEN	RARA	Central memory CD8 T cell
NCOR2	SIK1	Effector memeory CD8 T cell
EP300	BIRC3	Activated CD4 T cell
EP300	BRIP1	Activated CD4 T cell
EP300	CCL5	Activated CD4 T cell
EP300	CCNB1	Activated CD4 T cell
NCOR1	ETS1	Activated CD4 T cell
EP300	EXO1	Activated CD4 T cell
NCOR1	KIF11	Activated CD4 T cell
SPEN	BMI1	Central memory CD4 T cell
NCOR1	ITGB1	Central memory CD4 T cell
NCOR2	KLF5	Central memory CD4 T cell
EP300	ATM	Effector memeory CD4 T cell
NCOR1	EZH2	Effector memeory CD4 T cell
CREBBP	PTGS1	Effector memeory CD4 T cell
SPEN	BCL6	T follicular helper cell
EP300	CEBPA	T follicular helper cell
EP300	AQP9	Gamma delta T cell
NOTCH2	FURIN	Type 1 T helper cell
NCOR1	HSD11B1	Type 1 T helper cell
NCOR2	IGF2	Type 1 T helper cell
NCOR1	IL17RA	Type 17 T helper cell
NCOR2	ABCA1	Type 17 T helper cell
EP300	ABCB1	Type 17 T helper cell
CNTN6	GATA3	Type 2 T helper cell
EP300	BIRC5	Type 2 T helper cell
NCOR2	BACH2	Activated B cell
NCOR2	HDAC9	Immature B cell
EP300	TXNIP	Immature B cell
EP300	CCNA2	Memory B cell
NCOR2	MYC	Memory B cell
EP300	STAT5A	Memory B cell
CREBBP	CDH2	Natural killer cell
NOTCH2	DLL4	Natural killer cell
SPEN	GRB2	Natural killer cell
EP300	BCL2	Natural killer cell
SPEN	CDC5L	Natural killer cell
EP300	CREB3L4	CD56bright natural killer cell
EP300	CSNK2A2	CD56bright natural killer cell
EP300	CTSD	CD56bright natural killer cell
NCOR1	HOXA1	CD56bright natural killer cell
NCOR2	CYP27B1	CD56bright natural killer cell
NCOR2	CYP27A1	CD56dim natural killer cell
NCOR2	NOTCH3	CD56dim natural killer cell
NOTCH2	CCR2	Myeloid derived suppressor cell
EP300	CD2	Myeloid derived suppressor cell
SPEN	FERMT3	Myeloid derived suppressor cell
NOTCH2	CREB1	Natural killer T cell
EP300	CRTC2	Natural killer T cell
NCOR1	HSPA4	Natural killer T cell
NCOR2	CBX6	Plasmacytoid dendritic cell
SPEN	DDX17	Plasmacytoid dendritic cell
NOTCH2	TMED2	Plasmacytoid dendritic cell
NCOR2	IGF1	Plasmacytoid dendritic cell
CREBBP	ALDH1A2	Immature dendritic cell
EP300	CNR1	Macrophage
NOTCH2	ST3GAL6	Eosinophil
NCOR1	DACH1	Eosinophil
CREBBP	PTGS2	Mast cell
NCOR2	IKZF1	Monocyte
EP300	CREB5	Neutrophil
